# Supplementary material for: LDOC1 loss reprograms histone ubiquitination and chromatin, driving tumor plasticity and poor prognosis in NSCLC
Source: Research Square preprint supplement (doi:10.21203/rs.3.rs-7138921/v1), 2025-08-06
Supplement: Supplementary file 1 [file 85b84b772d0e2f25960ac324.docx]

**Supplementary Information**

**Supplementary Figure 1.** LDOC1 KD leads to large-scale alterations in gene expression. Scale bars represent the numbers of differentially expressed genes (DEGs) with FC > 2 between NSCLC A549 and PC9 cells with and without LDOC1 depletion.

**Supplementary Figure 2.** Sequences and structural features of LDOC1. (A) Primary amino acid sequence of human LDOC1 (UniProt Q9BUV0), highlighting the leucine zipper domain (residues 11–43, yellow), proline-rich region (residues 61–70, blue), and a highly acidic C-terminal region (residues 115–145, purple). Leucine residues in the zipper motif are indicated in red. (B) Ribbon diagram of AlphaFold-predicted LDOC1 structure (AF-Q9BUV0-F1), colored according to the domains in (A). (C) Electrostatic surface potential map of LDOC1 rendered in PyMOL using APBS. Red indicates negatively charged and blue indicates positively charged regions. The C-terminal region forms a prominent electronegative surface.

**Supplementary Figure 3.** LDOC1 colocalizes with RNF40 in A549 cells.Confocal microscopy of A549 cells stained with antibodies against LDOC1 (red), RNF40 (green), and DAPI (blue). white arrows in the enlarged merged images highlight nuclear colocalization of LDOC1 and RNF40.

**Supplementary Figure 4. A**ltered transcriptome caused by LDOC1 knockdown in A549 cells. MetaCore pathway enrichment analysis of upregulated (**A**) and downregulated (**B**) pathways in A549-shLDOC1 cells based on transcriptomic profiling. Metastasis-related pathways are marked with red stars. **(C, D)** Heatmaps showing significantly upregulated (C) and downregulated (D) metastasis-related genes in A549-shLDOC1 cells. Fold-change (FC) values were calculated from Affymetrix microarray data; genes with FC > 2 or < –2 and p < 0.05 were considered significant.

**Supplementary Figure 5.** Kaplan–Meier (KM) curves for overall survival (OS) in chemotherapy-treated NSCLC patients with high versus low H2Bub1 expression.
